# Supplementary material for: Understanding of morphology evolution in local aggregates and neighboring regions for organic photovoltaics
Source: Royal Society of Chemistry journal article supplement (doi:10.1039/c2cp40503b), 2012-01-01
Supplement: c2cp40503b.pdf [file c2cp40503b.pdf]

Electronic Supplementary Information

## **Understanding of Morphology Evolution in Local Aggregates and Neighboring Regions for Organic Photovoltaics**

*Yu Xie,<sup>a</sup> Ying Bao,<sup>b</sup> Jikai Du,<sup>c</sup> Chaoyang Jiang,<sup>b</sup> and Qiquan Qiao,<sup>\*,a</sup>*

a. Center for Advanced Photovoltaics, Department of Electrical Engineering & Computer Science,  
South Dakota State University, Brookings, SD 57006

b. Department of Chemistry, University of South Dakota, Vermillion, SD 57069

c. Department of Mechanical Engineering, South Dakota State University, Brookings, SD 57006

\*To whom correspondence should be addressed.

E-mail: [Qiquan.Qiao@sdstate.edu](mailto:Qiquan.Qiao@sdstate.edu)

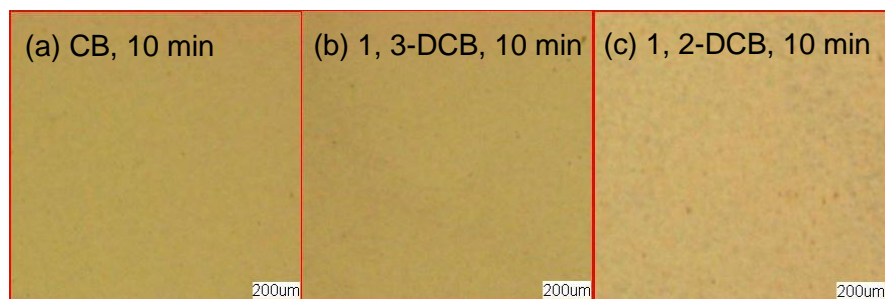

**Figure S1.** Optical images ( $200\ \mu\text{m} \times 200\ \mu\text{m}$ ) of pure P3HT films from (a) CB, (b) 1, 3-DCB and (c) 1, 2-DCB after thermal annealing ( $140\ ^\circ\text{C}$ , 10 min).

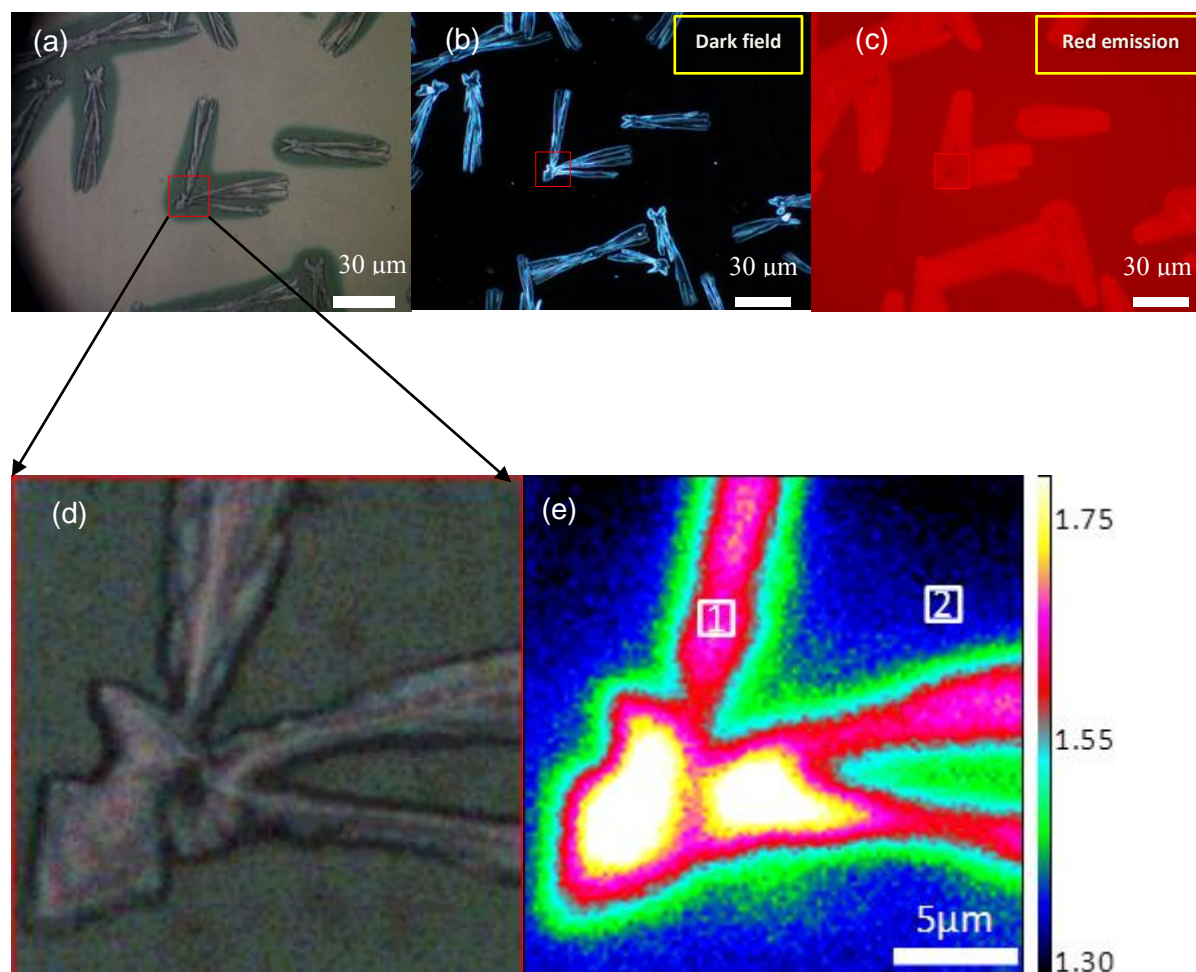

**Figure S2.** Images of the thermally annealed (140 °C, 20 min) P3HT/PCBM blend film from CB: (a) optical image, (b) dark field image, (c) red emission image with green light excitation, (d) optical image ( $20\ \mu\text{m} \times 20\ \mu\text{m}$ ) of a selected location in the film, and (e) fluorescence intensity ratio (720 nm/650 nm) mapping (excitation: 532 nm) of the location. Region 1 was on PCBM-rich aggregate area while region 2 was a PCBM-deficient area. The dark field images were captured with 60 ms exposure time on a Nikon Eclipse LV150 microscope equipped with high-intensity 12V-50W halogen light source, using a 50 $\times$  objective.

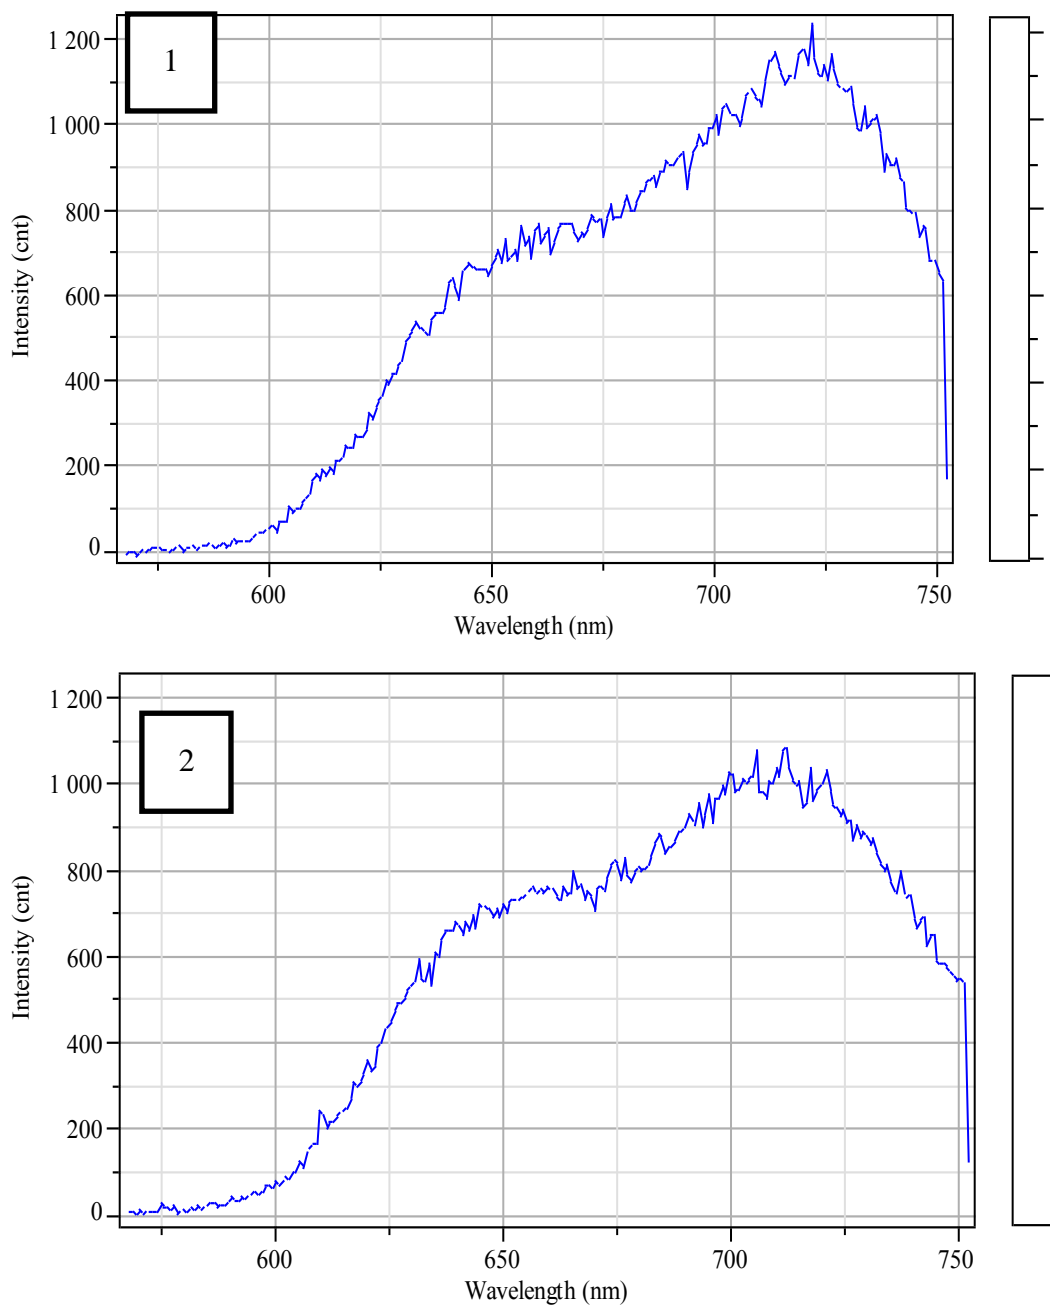

**Figure S3.** Fluorescence spectra (excitation: 532 nm) of locations (regions 1 and 2 shown in Figure S2e) in the thermally annealed (140 °C, 20 min) P3HT/PCBM blend film from CB.

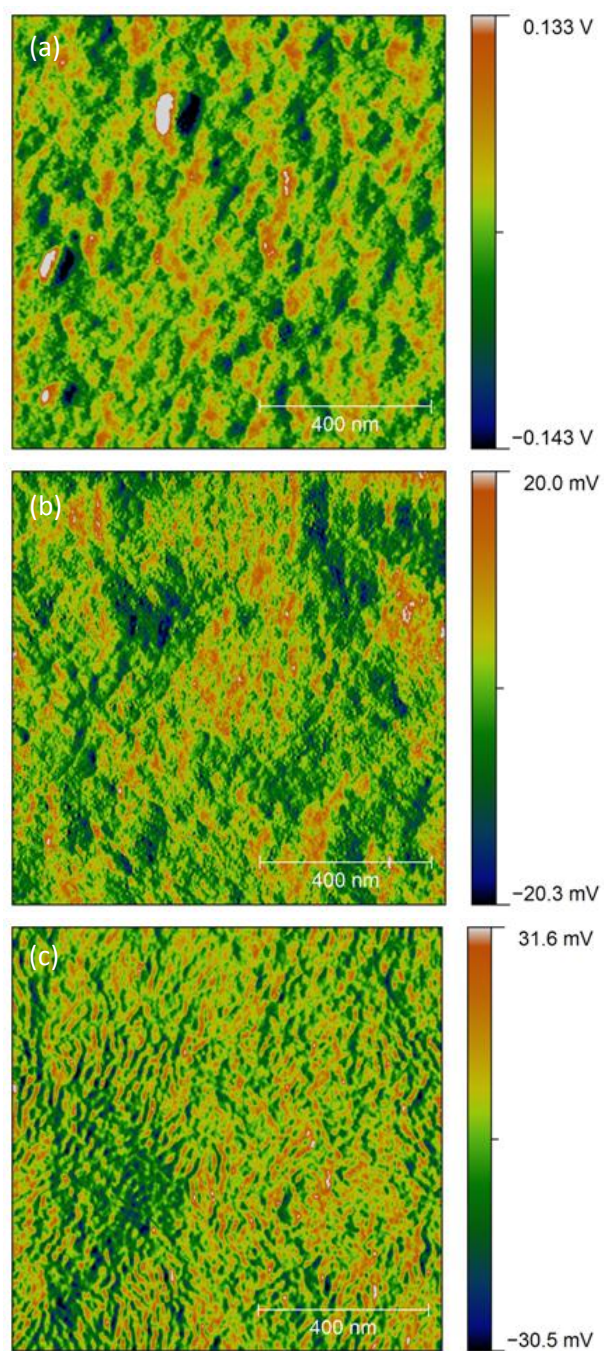

**Figure S4.** AFM amplitude images ( $1 \mu\text{m} \times 1 \mu\text{m}$ , scale bar: 400 nm) at region 3 of thermally annealed ( $140^\circ\text{C}$ , 10 min) P3HT/PCBM blend films from (a) CB, (b) 1, 3-DCB, and (c) 1, 2-DCB.



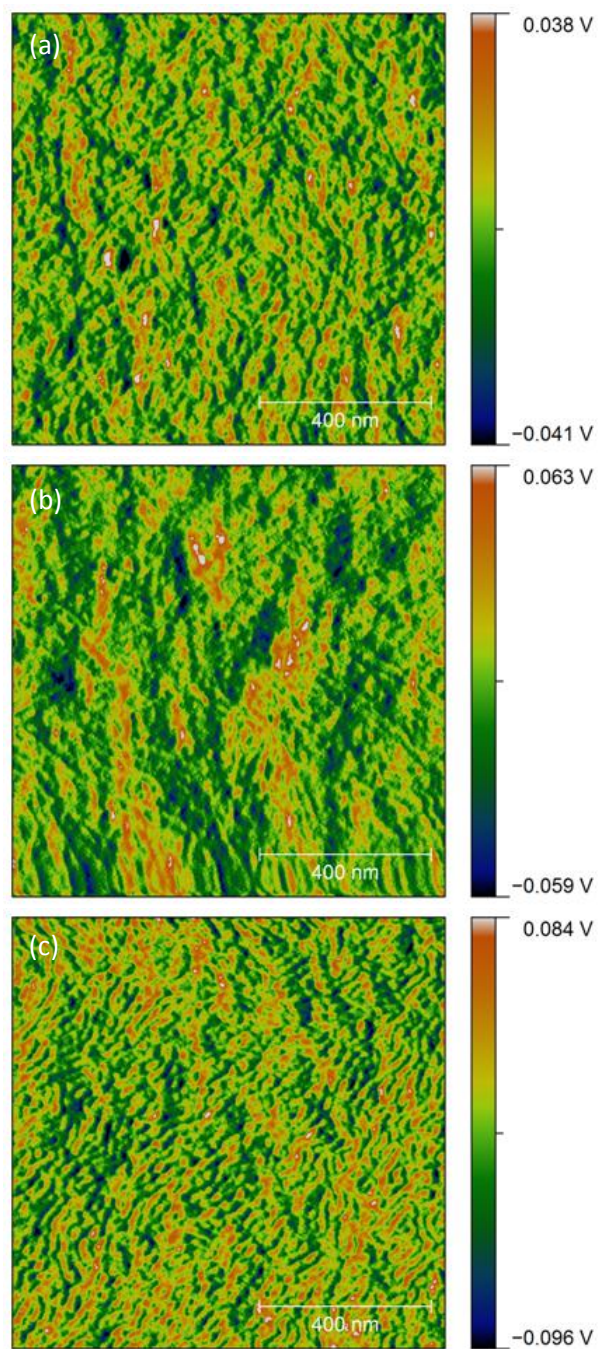

**Figure S5.** AFM amplitude images ( $1\ \mu\text{m} \times 1\ \mu\text{m}$ , scale bar: 400 nm) at region 2 of thermally annealed ( $140\ ^\circ\text{C}$ , 10 min) P3HT/PCBM blend films from (a) CB, (b) 1, 3-DCB, and (c) 1, 2-DCB.

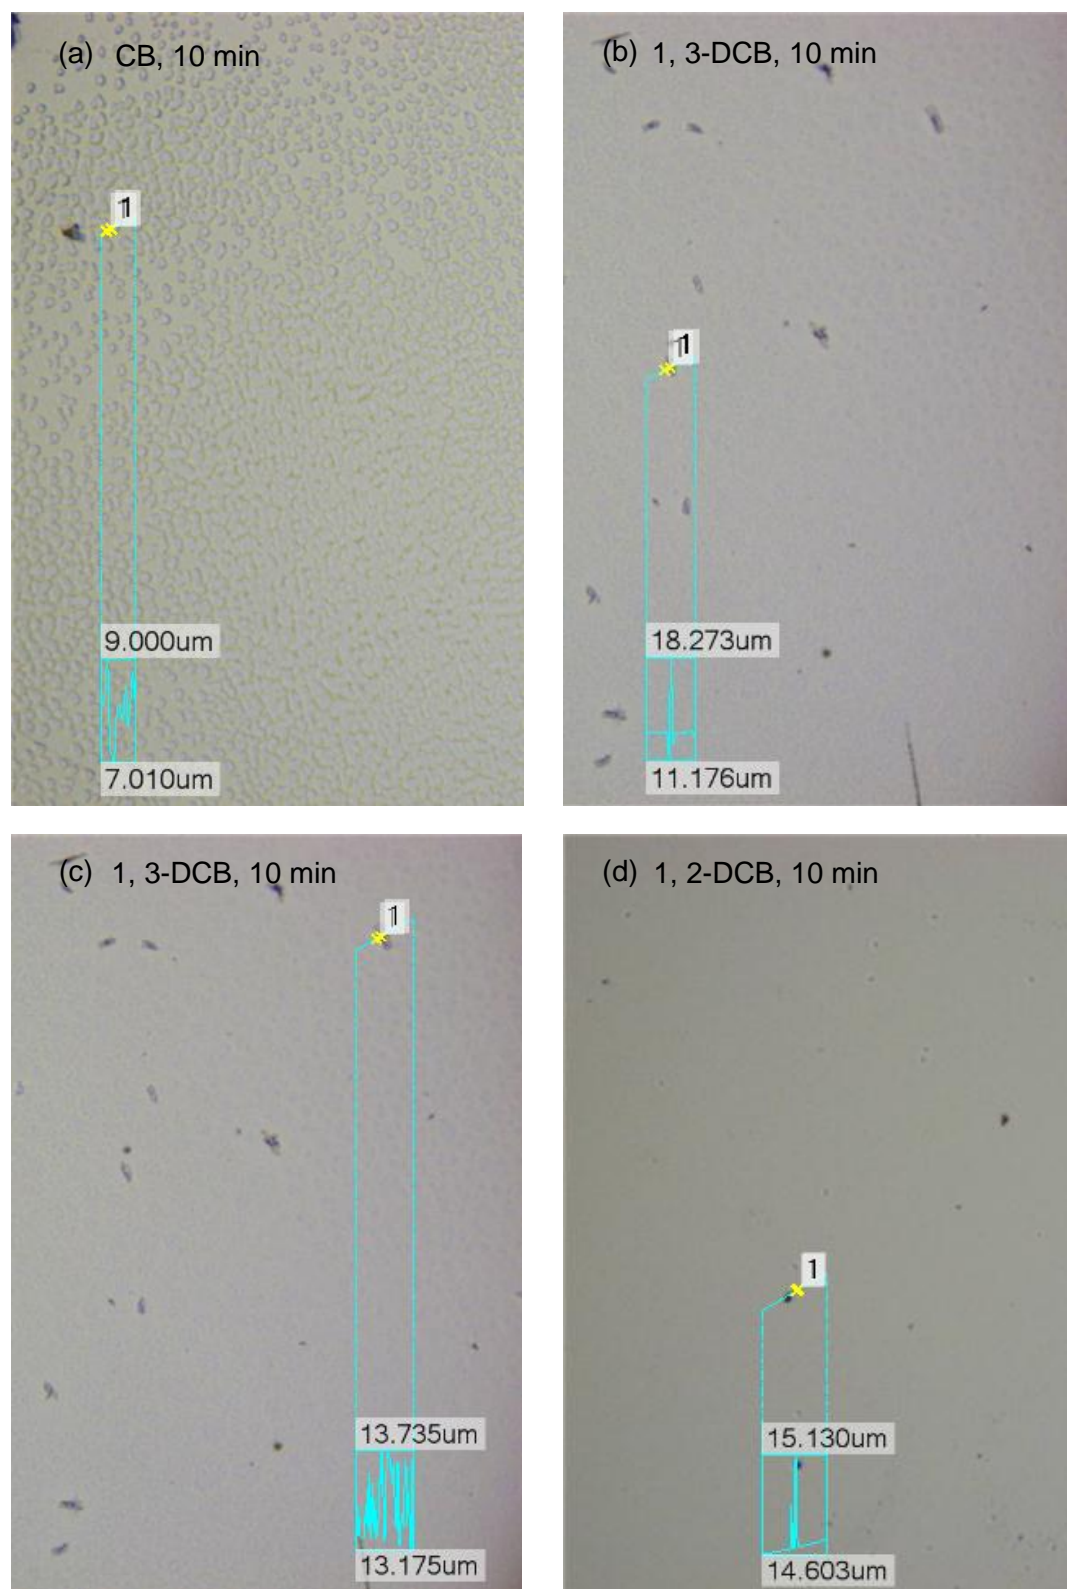

**Figure S6.** Optical images ( $\sim 525 \mu\text{m} \times \sim 350 \mu\text{m}$ ) with relatively vertical dimensions of aggregates in active layers (with top electrodes, thermally annealed at  $140^\circ\text{C}$  for 10 min) from (a) CB, (b, c) 1, 3-DCB and (d) 1, 2-DCB. Aggregates' absolute vertical dimensions can be estimated by gaps of relatively vertical dimensions.

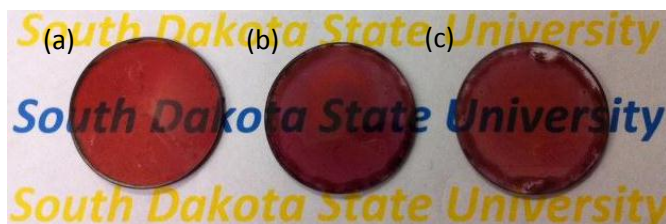

**Figure S7.** Photo of thermally annealed (140 °C, 20 min) P3HT/PCBM blend films from (a) CB, (b) 1, 3-DCB, and (c) 1, 2-DCB.
